# Supplementary material for: Mesoporous silica nanoparticles grafted with a light-responsive protein shell for highly cytotoxic antitumoral therapy
Source: Royal Society of Chemistry journal article supplement (doi:10.1039/c5tb00304k), 2015-01-01
Supplement: c5tb00304k1.pdf [file c5tb00304k1.pdf]

## Supporting Information

### Mesoporous silica nanoparticles grafted with light-responsive protein shell for highly cytotoxic antitumoral therapy.

*Marina Martínez-Carmona, Alejandro Baeza,\* Miguel A. Rodríguez-Milla, Javier García-Castro, and Maria Vallet-Regí.\**

#### Reagents.

Following compounds were purchased from Sigma-Aldrich Inc.: Avidin from egg white (powder, 10-15 U/mg protein (E1%/280),  $\geq 98\%$  (SDS-PAGE)), Streptavidin from *Streptomyces avidinii* (10 mM potassium phosphate,  $\geq 13$  U/mg protein), Biotin ( $\geq 99\%$  (TLC)), Transferrin human (powder, suitable for cell culture), N,N'-Dicyclohexylcarbodiimide (DCC), N-hydroxysuccinimide (NHS), Doxorubicin hydrochloride (European Pharmacopoeia), Oxaliplatin, Tris(2,2'-bipyridyl)dichlororuthenium (II) ( $[\text{Ru}(\text{bipy})_3]\text{Cl}_2$ ), (+)-Biotin N-hydroxysuccinimide ester (NHS-B), aminopropyltriethoxysilane (APTES), ammonium nitrate, cetyltrimethylammonium bromide (CTAB), tetraethyl orthosilicate (TEOS). Fmoc-photolinker was purchased from abcr. All other chemicals (absolute ethanol, acetone, etc.) were of the best quality commercially available and they have been employed as received.

#### Characterization techniques.

Powder X-ray diffraction (XRD) experiments were performed with a Philips X'Pert diffractometer equipped with Cu K $\alpha$  radiation (wavelength 1.5406 Å). XRD patterns were collected in the 2 $\theta$  range between 0.6° and 8 with a step size of 0.02° and counting time of 5 s per step. Fourier transform infrared spectroscopy (FTIR) in a Thermo Nicolet nexus equipped with a Goldengate attenuated total reflectance device. The textural properties of the materials were determined by nitrogen sorption porosimetry by using a Micromeritics ASAP 2010. To perform the N<sub>2</sub> measurements, the samples were previously degassed under vacuum for 24 h at room temperature. Thermogravimetry analysis (TGA) were performed in a Perkin Elmer Pyris Diamond TG/DTA analyzer, with 5 °C/min heating ramps, from room temperature to 600 °C. The hydrodynamic size of mesoporous nanoparticles was measured by means of a Zetasizer Nano ZS (Malvern Instruments) equipped with a 633 nm "red" laser. Mass spectra were acquired with a Voyager DE-STR Biospectrometry MALDI-TOF mass spectrometer. Transmission electron microscopy (TEM) was carried out with a JEOL JEM 1010 instrument operated at 100 kV, equipped with a CCD camera (KeenView Camera). Sample preparation was performed by dispersing in distilled water and subsequent deposition onto carbon-coated copper grids. Scanning electron microscopy (SEM) analyses were made on a JEOL 6400-LINK AN10000 microscope (Electron Microscopy Centre, UCM). The samples underwent Au metallization previous to observation.

#### Calculation procedures.

The surface area was determined using the Brunauer-Emmett-Teller (BET) method and the pore volume,  $V_{\text{pore}}$  ( $\text{cm}^3 \cdot \text{g}^{-1}$ ), was estimated from the amount of  $\text{N}_2$  adsorbed at a relative pressure around 0.99. The pore size distribution between 0.5 and 40 nm was calculated from the desorption branch of the isotherm by means of the Barrett-Joyner-Halenda (BJH) method. The mesopore size,  $\phi_{\text{pore}}$  (nm), was determined from the maximum of the pore size distribution curve.

## FIGURES

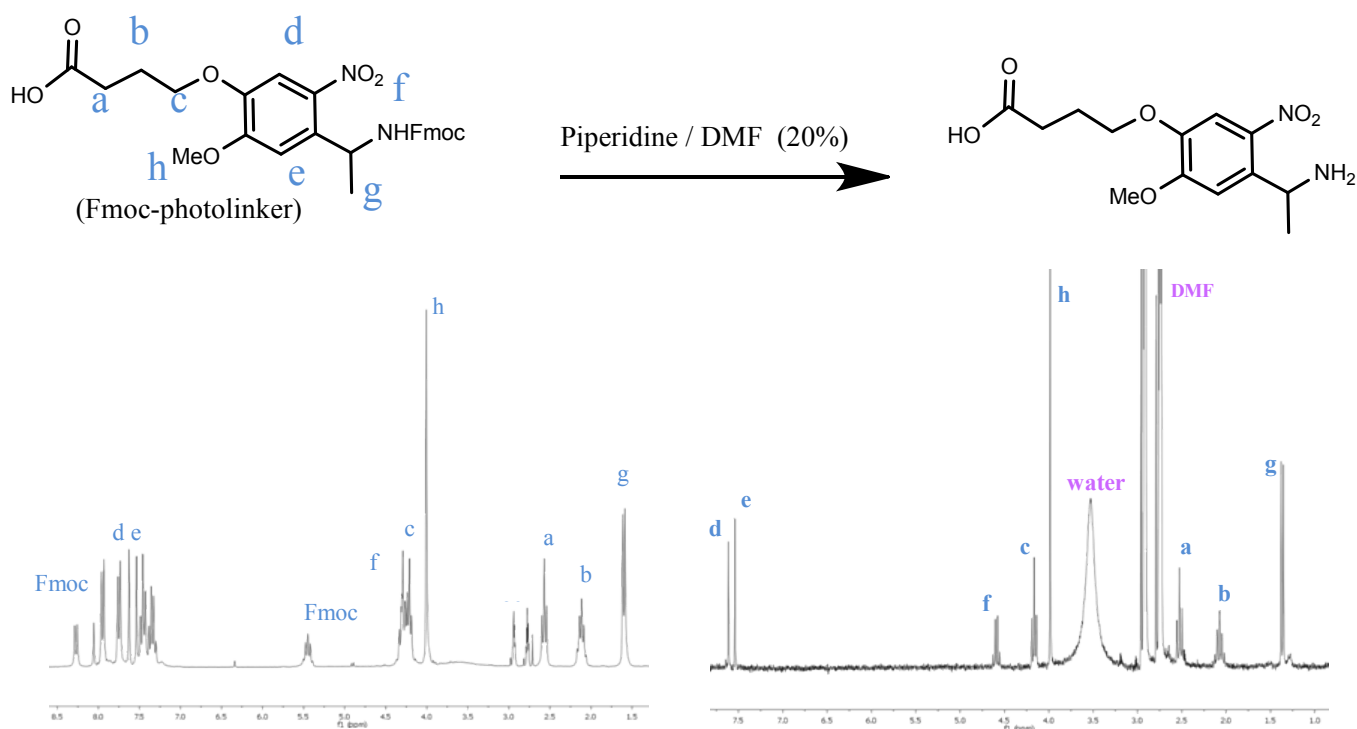

**Figure S1.**  $^1\text{H}$ -RMN of Fmoc-photolinker and photolinker deprotected (Phol1)

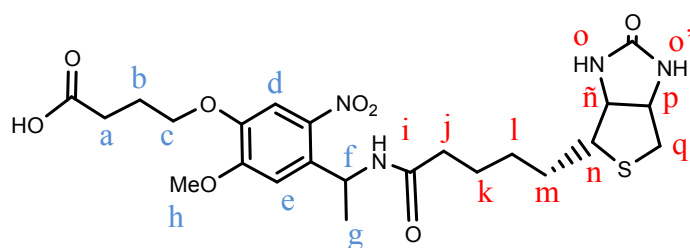

**Figure S2.**  $^1\text{H}$ -RMN of the biotin-photolinker (Phol2)

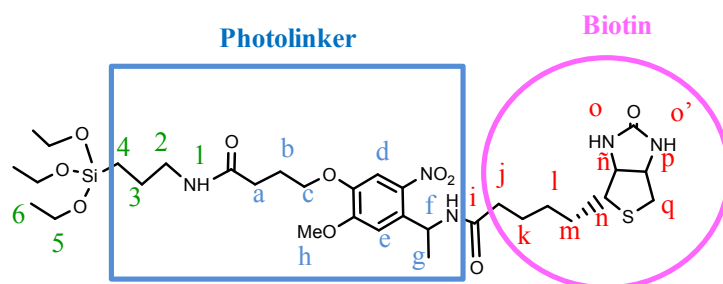

**Figure S3.**  $^1\text{H}$ -RMN of the silated biotin-photolinker (PhoL3)

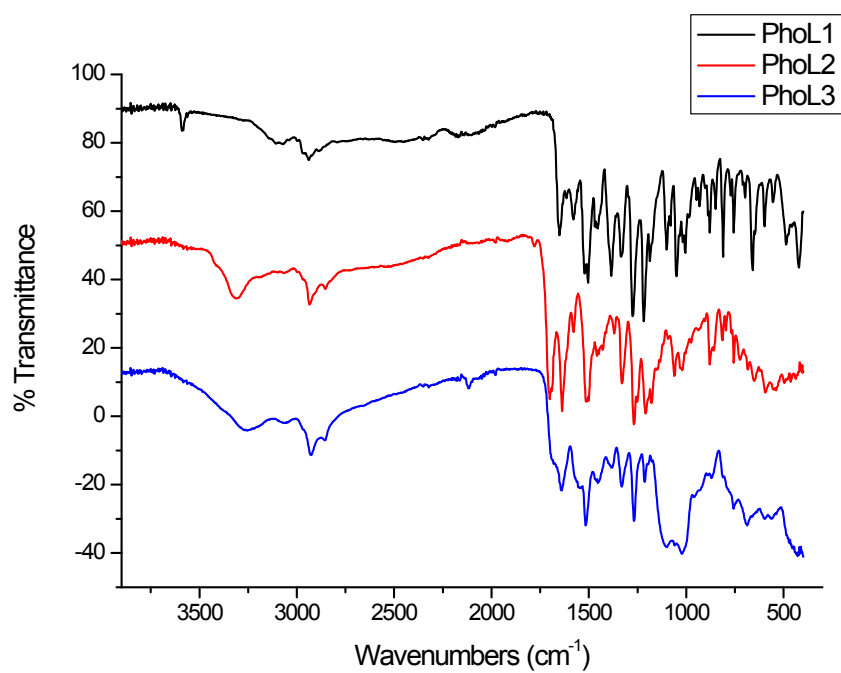

**Figure S4.** IR spectrum of PhoLX

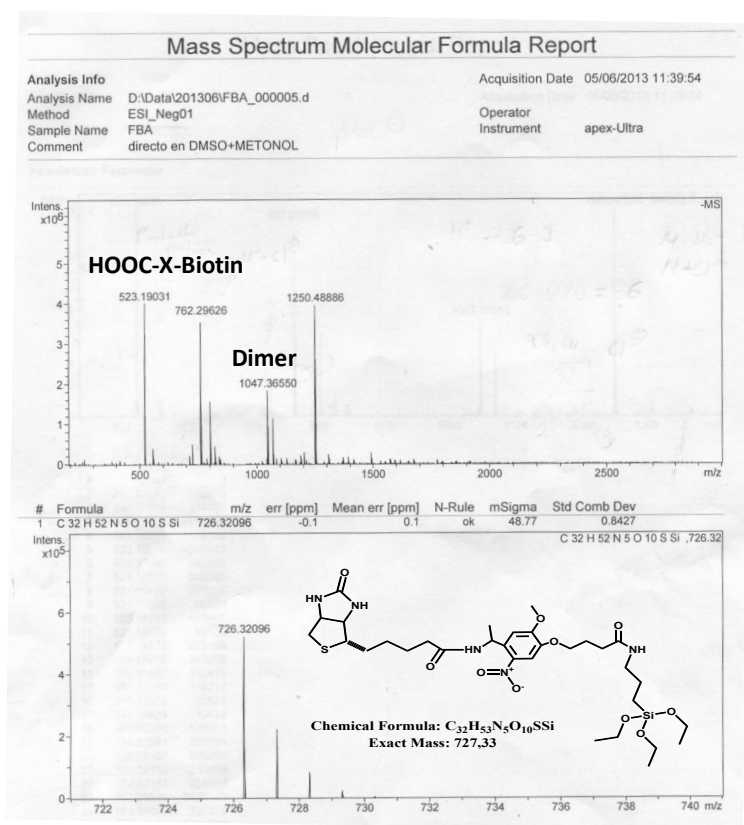

**Figure S5.** Mass Spectrum of PhoL3

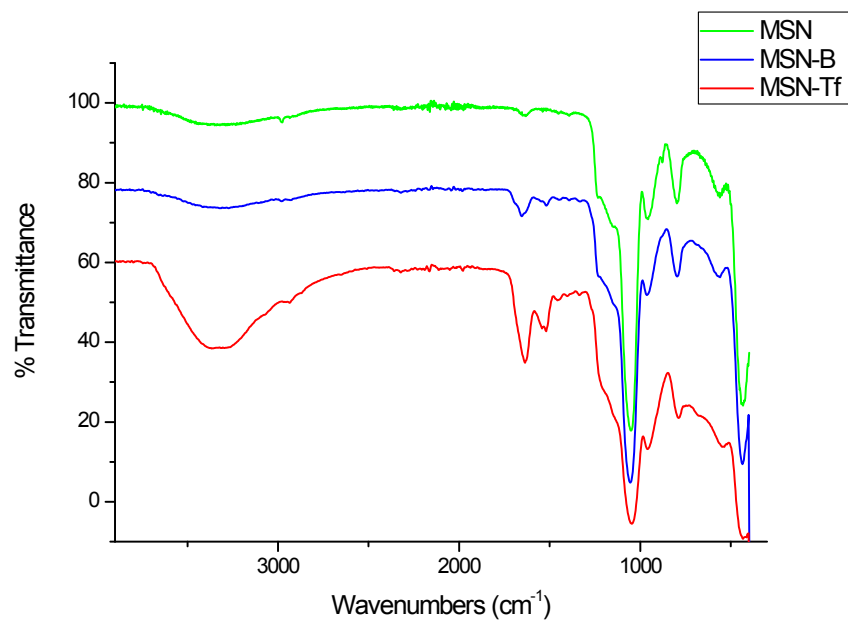

**Figure S6.** IR spectrum of MSN materials

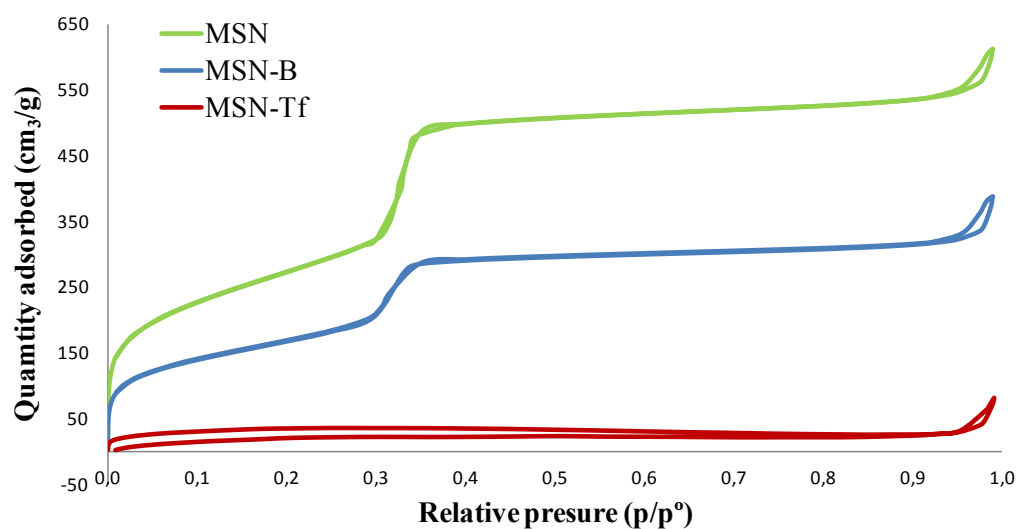

**Figure S7.** Isotherm linear plot of MSN materials

| Sample | BET Surface ( $\text{m}^2 \cdot \text{g}^{-1}$ ) | $V_{\text{pore}}$ ( $\text{cm}^3 \cdot \text{g}^{-1}$ ) | $\Phi_{\text{pore}}$ (nm) |
|--------|--------------------------------------------------|---------------------------------------------------------|---------------------------|
| MSN    | <b>951.82</b>                                    | <b>0.863</b>                                            | <b>2.4</b>                |
| MSN-B  | <b>580.60</b>                                    | <b>0.516</b>                                            | <b>2.4</b>                |
| MSN-Tf | <b>120.73</b>                                    | <b>0.061</b>                                            | -                         |

**Table S1.** Textural parameters of MSN materials

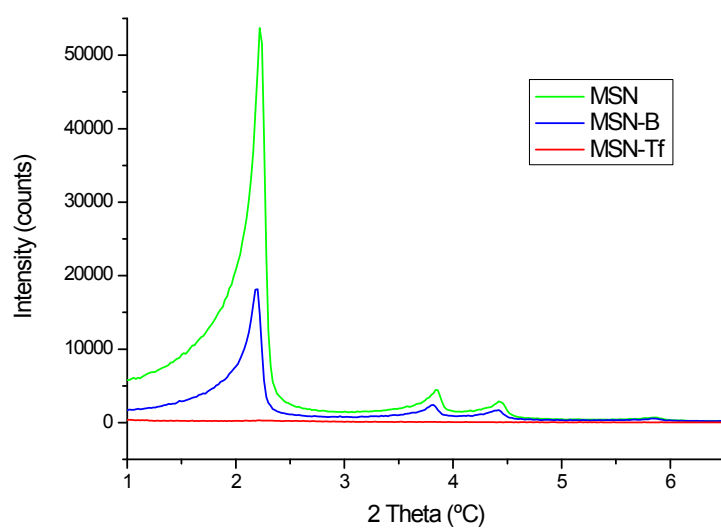

**Figure S8.** Small-angle XRD pattern of MSN materials

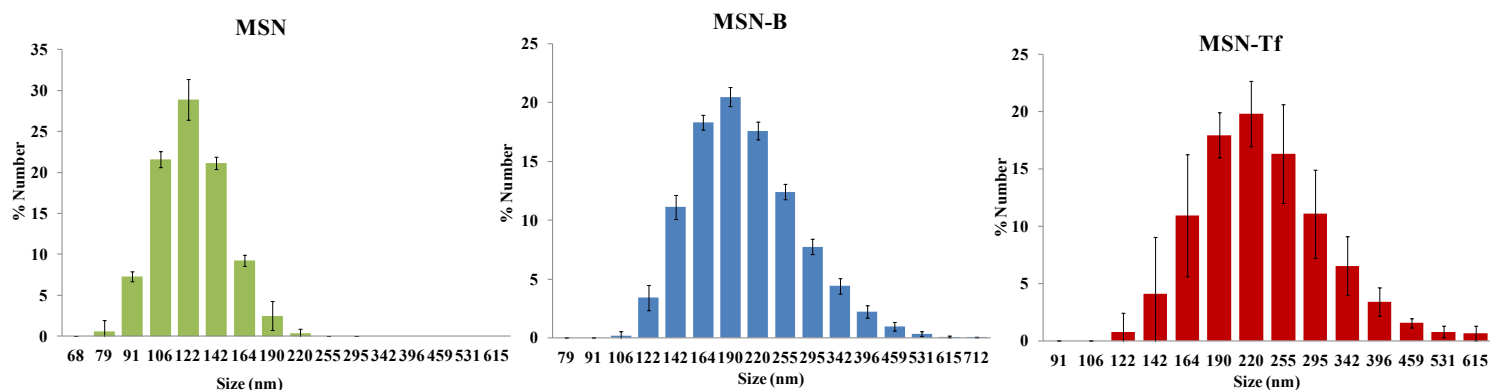

**Figure S9.** DLS measurements of MSN materials.

| Sample | M   | $\bar{x}$ | $\sigma$ | PDI  |
|--------|-----|-----------|----------|------|
| MSN    | 122 | 125       | 22.6     | 0.03 |
| MSN-B  | 190 | 213       | 64.5     | 0.09 |
| MSN-Tf | 220 | 245       | 84.0     | 0.12 |

**Table S2.** Sadistic parameters calculated from DLS measurements.

The **mode** (M) is the value that appears most often in a set of data.

**Arithmetic mean;**

$$\bar{x} = \frac{1}{n} \sum_{i=1}^n x_i$$

**Standard deviation;**

$$\sigma = \sqrt{\frac{\sum_{i=1}^n (x_i - \bar{x})^2 f_i}{N}}$$

**Polydispersity index; PDI =  $\left(\frac{\sigma}{\bar{x}}\right)^2$**

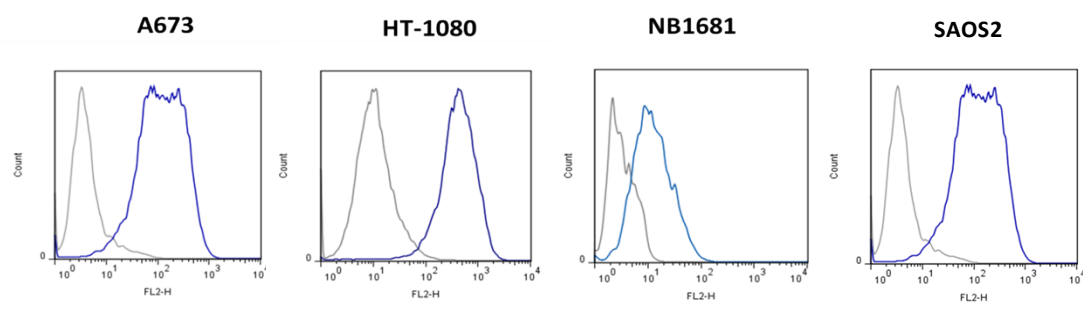

**Figure S10.** Flow cytometry of A673, HT1080, NB1681 and SAOS2 cells marked with an anti-transferrin receptor antibody (blue) or isotype antibody control (grey)

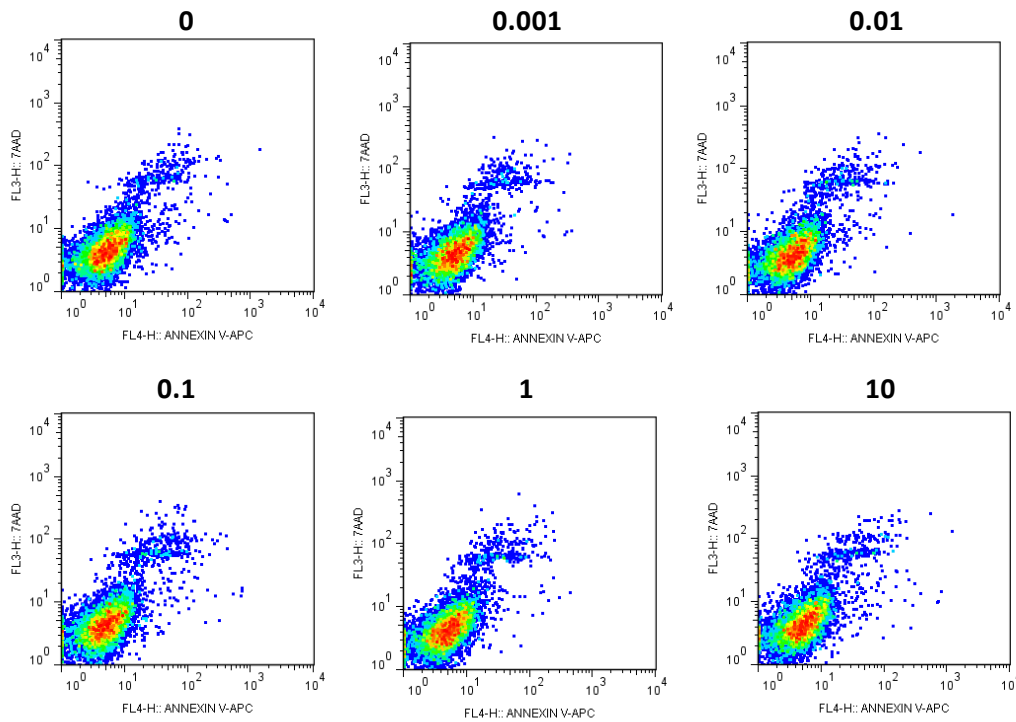

**Figure S11.** Flow cytometry of Oxaliplatin nanoparticles-treated HT1080 cells (without UV irradiation), stained with Annexin-V and 7-AAD. Doses of Oxaliplatin in  $\mu\text{g/mL}$ . These data indicate that incubation with nanoparticles but without UV irradiation has no effect over viability of tumoral cells.

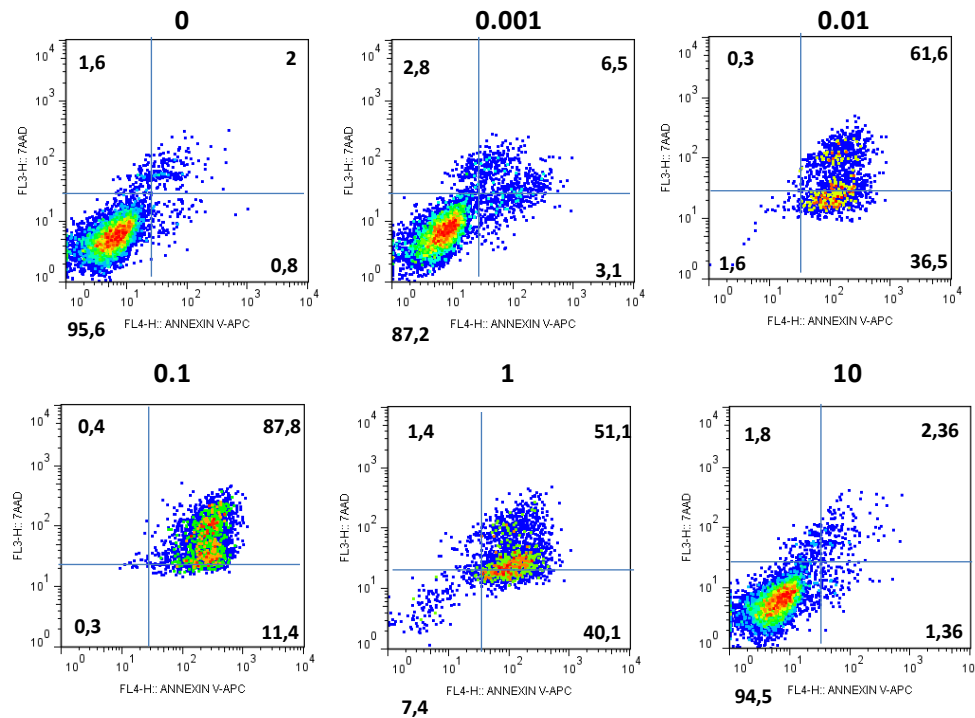

**Figure S12.** Flow cytometry of Oxaliplatin nanoparticles-treated and UV irradiated HT1080 cells, stained with Annexin-V and 7-AAD. Doses of Oxaliplatin in  $\mu\text{g/mL}$ . These data indicate that incubation with nanoparticles and UV irradiation has a high effect over viability of tumoral cells, with a 100% of apoptosis in doses so lower as  $0.01\mu\text{g/mL}$
